# Supplementary material for: Lead Dependent Tricuspid Valve Dysfunction-Risk Factors, Improvement after Transvenous Lead Extraction and Long-Term Prognosis
Source: MDPI journal article supplement (doi:10.3390/jcm11010089), 2021-12-24
Supplement: s1 [file s1]

## Supplementary file

### Lead dependent tricuspid valve dysfunction- risk factors, improvement after transvenous lead extraction and long-term prognosis

**Table S1. Clinical data. Classification according to the the influence of TLE on LDTVd**

|                                                                                                    | LDTVd improvement after TLE |        | LDTVd Lack of improvement after TLE |        |        | All examined patients (2678) |        |
|----------------------------------------------------------------------------------------------------|-----------------------------|--------|-------------------------------------|--------|--------|------------------------------|--------|
| Number of patients / number of the group                                                           | 42                          | 3      | 77                                  | 4      | P      | 2678                         | 5      |
| Presented values                                                                                   | Count / average             | % / Sd | Count / average                     | % / Sd | 3 vs 4 | Count / average              | % / Sd |
| <b>Patient-related potential risk factors</b>                                                      |                             |        |                                     |        |        |                              |        |
| Patient's age during TLE                                                                           | 68,93                       | 17,72  | 67,64                               | 13,50  | 0,049  | 66,95                        | 14,55  |
| Patient's age during first system implantation                                                     | 60,65                       | 18,57  | 57,27                               | 16,02  | 0,028  | 58,32                        | 16,21  |
| Sex (% of female patients)                                                                         | 27                          | 64,29% | 40                                  | 51,95% | 0,27   | 1062                         | 39,66% |
| Baseline heart diseases: IHD, MI                                                                   | 30                          | 71,43% | 39                                  | 50,65% | 0,05   | 1563                         | 58,36% |
| Baseline heart diseases: primary cardiomyopathy                                                    | 4                           | 9,52%  | 9                                   | 11,69% | 0,96   | 356                          | 13,29% |
| Baseline heart diseases: valvular heart disease                                                    | 0                           | 0,00%  | 10                                  | 12,99% | 0,036  | 69                           | 2,58%  |
| Baseline heart diseases: post-inflammatory .congenital, channelopathies, neurocardiogenic, unknown | 6                           | 19,05% | 19                                  | 24,68% | 0,274  | 689                          | 25,73% |
| NYHA class I-IV                                                                                    | 2.17                        | 0.73   | 2.21                                | 0.84   | 0.74   | 1.86                         | 0.68   |
| AF permanent                                                                                       | 16                          | 38,10% | 34                                  | 44,16% | 0,66   | 615                          | 22,97% |
| Hypertension                                                                                       | 24                          | 57,14% | 42                                  | 54,55% | 0,94   | 1553                         | 57,99% |
| Diabetes (any)                                                                                     | 10                          | 23,81% | 11                                  | 14,29% | 0,29   | 555                          | 20,72% |
| Renal failure (any)                                                                                | 10                          | 23,81% | 24                                  | 31,17% | 0,52   | 572                          | 21,36% |
| Valvular implant presence                                                                          | 3                           | 7,14%  | 19                                  | 24,68% | 0,035  | 178                          | 6,65%  |
| Mechanical valve presence                                                                          | 3                           | 7,14%  | 12                                  | 15,58% | 0,3    | 107                          | 4,00%  |
| Previous sternotomy                                                                                | 4                           | 9,52%  | 20                                  | 25,97% | 0,058  | 383                          | 14,30% |
| Long-term anticoagulation                                                                          | 25                          | 59,52% | 48                                  | 62,34% | 0,92   | 1073                         | 40,07% |
| Charlson's index (points)                                                                          | 5,62                        | 4,13   | 4,65                                | 3,19   | 0,21   | 4,84                         | 3,68   |

**Table S2. Indication, system and history of pacing -related factors. Classification according to the influence of TLE on LDTV**

|                                                                                        | LDTV<br>improvement after<br>TLE |               | LDTV Lack of<br>improvement after<br>TLE |              |               | All examined<br>patients (2678) |              |
|----------------------------------------------------------------------------------------|----------------------------------|---------------|------------------------------------------|--------------|---------------|---------------------------------|--------------|
| <b>Number of patients number of the group</b>                                          | <b>42</b>                        | <b>3</b>      | <b>77</b>                                | <b>4</b>     |               | <b>2678</b>                     | <b>5</b>     |
| <b>Presented values</b>                                                                | <b>Count /<br/>average</b>       | <b>% / Sd</b> | <b>Count /<br/>average</b>               | <b>%/ Sd</b> | <b>3 vs 4</b> | <b>Count /<br/>average</b>      | <b>%/ Sd</b> |
| <b>TLE indications</b>                                                                 |                                  |               |                                          |              |               |                                 |              |
| LRIE certain with or without pocket infection                                          | 0                                | 0,00%         | 13                                       | 16,88%       | 0,012         | 471                             | 17,59%       |
| LRIE probable with or without pocket infection                                         | 2                                | 4,76%         | 2                                        | 2,60%        | 0,925         | 163                             | 6,09%        |
| Local / isolated pocket infection                                                      | 3                                | 7,14%         | 1                                        | 1,30%        | 0,247         | 210                             | 7,84%        |
| All infections                                                                         | 5                                | 11,91%        | 16                                       | 20,78%       | 0,336         | 844                             | 31,52%       |
| Non-infectious prophylactic indications                                                | 34                               | 80,95%        | 2                                        | 2,60%        | 0,001         | 91                              | 3,40%        |
| Non-infectious therapeutic indications                                                 | 0                                | 0,00%         | 59                                       | 76,62%       | 0,001         | 1743                            | 65,09%       |
| All non-infectious indications                                                         | 34                               | 80,95%        | 61                                       | 79,22%       | 0,989         | 1834                            | 68,48%       |
| <b>System and history of pacing</b>                                                    |                                  |               |                                          |              |               |                                 |              |
| Device type - PM (AAI, VVI, DDD, CRT-P)                                                | 35                               | 85,71%        | 64                                       | 83,12%       | 0,821         | 1886                            | 70,43%       |
| Device type - ICD (VVI, DDD)                                                           | 4                                | 9,52%         | 5                                        | 6,49%        | 0,814         | 585                             | 22,88%       |
| Device type - CRT-D                                                                    | 2                                | 4,76%         | 8                                        | 10,39%       | 0,477         | 206                             | 7,69%        |
| Number of leads in the system before TLE                                               | 1,83                             | 0,58          | 1,84                                     | 0,76         | 0,647         | 1,83                            | 0,63         |
| Presence of abandoned lead before TLE                                                  | 5                                | 11,91%        | 11                                       | 14,29%       | 0,716         | 286                             | 10,68%       |
| Number of abandoned leads before TLE                                                   | 0,12                             | 0,33          | 0,260                                    | 0,70         | 0,599         | 0,14                            | 0,44         |
| Number of leads in the heart before TLE                                                | 1,95                             | 0,58          | 2,078                                    | 0,93         | 0,647         | 1,96                            | 0,73         |
| 4 and > 4 leads before TLE                                                             | 1                                | 2,38%         | 6                                        | 7,79%        | 0,429         | 80                              | 2,99%        |
| One ICD lead before TLE                                                                | 5                                | 11,91%        | 13                                       | 16,88%       | 0,648         | 780                             | 29,13%       |
| 2 or more ICD leads before TLE                                                         | 1                                | 2,38%         | 1                                        | 1,30%        | 0,759         | 29                              | 1,08%        |
| Apical RV lead location (lead analysis)                                                | 32                               | 39,51%        | 69                                       | 43,13%       | 0,092         | 2159                            | 41,42%       |
| Out of apical (septal, outflow tract, anterior wall) RV lead location (lead analysis)  | 12                               | 14,82%        | 18                                       | 11,25%       | 0,687         | 513                             | 9,84%        |
| Previous TLE in history                                                                | 3                                | 7,14%         | 4                                        | 5,20%        | 0,981         | 143                             | 5,35%        |
| Upgrading or downgrading with lead abandonment                                         | 4                                | 9,52%         | 7                                        | 9,09%        | 0,819         | 169                             | 6,31%        |
| Excessive long lead loop in the atrium (fluoroscopy)                                   | 9                                | 21,43%        | 9                                        | 11,69%       | 0,250         | 329                             | 12,48%       |
| Excessive lead loop crossing TV or in the ventricle (fluoroscopy) A                    | 7                                | 16,67%        | 17                                       | 22,08%       | 0,643         | 140                             | 5,23%        |
| Fluoroscopic impression of lead collision with TV (without loop) to tense or to long B | 11                               | 26,19%        | 14                                       | 18,18%       | 0,430         | 40                              | 1,49%        |
| Fluoroscopic impression of lead loop collision with TV C                               | 8                                | 19,05%        | 17                                       | 22,08%       | 0,879         | 140                             | 5,23%        |
| All lead's collision with TV (A+B+C)                                                   | 26                               | 61,91%        | 48                                       | 62,34%       | 0,898         | 320                             | 11,95%       |
| Dwell time of oldest one lead in the patient before TLE                                | 100,69                           | 65,430        | 125,623                                  | 88,780       | 0,335         | 104,313                         | 75,96        |
| Mean lead dwell time (in the patient) before TLE (in months)                           | 94,57                            | 56,02         | 114,91                                   | 74,36        | 0,325         | 95,36                           | 67,10        |

Abbreviations: CRT- cardiac resynchronization therapy, ICD- implantable cardioverter defibrillator, LRIE- lead related infective endocarditis, MI- myocardial infarction, LDTV- lead dependent tricuspid valve dysfunction, PM- pacemaker, RV- right ventricle, TLE- transvenous lead extraction, TV- tricuspid valve,

**Table S3. TLE procedure complexity, efficacy, complications, outcomes and long-term mortality after TLE. Classification according to the influence of TLE on LDTVd.**

| TLE procedure complicity, efficacy, complications, outcomes and long-term mortality after TLE | LDTVd improvement after TLE |         | LDTVd Lack of improvement after TLE |        |        | All examined patients (2678) |        |
|-----------------------------------------------------------------------------------------------|-----------------------------|---------|-------------------------------------|--------|--------|------------------------------|--------|
| Number of patients number of the group                                                        | 42                          | 3       | 77                                  | 4      | P      | 2678                         | 5      |
| Presented values                                                                              | Count / average             | % / Sd  | Count / average                     | % / Sd | 3 vs 4 | Count / average              | % / Sd |
| <b>TLE procedure complexity</b>                                                               |                             |         |                                     |        |        |                              |        |
| Procedure duration (sheath to sheath)                                                         | 14,00                       | 15,19   | 24,30                               | 42,877 | 0,800  | 14,75                        | 22,45  |
| Average time of single lead extraction (sheath-to sheath / number of extracted leads)         | 7,675                       | 7,157   | 12,883                              | 20,590 | 0,998  | 8,576                        | 12,313 |
| Technical problem during TLE (any)                                                            | 7                           | 16,67%  | 22                                  | 28,57% | 0,222  | 560                          | 20,91% |
| Number of big technical problems                                                              | 1,43                        | 1,79    | 1,82                                | 1,25   | 0,302  | 1,365                        | 0,70   |
| One technical problem only                                                                    | 5                           | 11,91%  | 11                                  | 14,29% | 0,934  | 338                          | 12,62% |
| Two or more technical Problems                                                                | 2                           | 4,76%   | 10                                  | 12,99% | 0,269  | 125                          | 4,45%  |
| <b>Utility of additional tools</b>                                                            |                             |         |                                     |        |        |                              |        |
| Evolution (old and new) or TighRail                                                           | 1                           | 2,38%   | 5                                   | 6,49%  | 0,988  | 44                           | 1,64%  |
| Lasso catheter / snare                                                                        | 0                           | 0,00%   | 7                                   | 9,09%  | 0,108  | 103                          | 3,85%  |
| Basket catheter                                                                               | 2                           | 4,76%   | 1                                   | 1,30%  | 0,589  | 20                           | 0,75%  |
| <b>TLE efficacy and complications</b>                                                         |                             |         |                                     |        |        |                              |        |
| Major Complications (any)                                                                     | 0                           | 0,00%   | 1                                   | 1,30%  | 0,757  | 51                           | 1,90%  |
| Hemopericardium                                                                               | 0                           | 0,00%   | 1                                   | 1,30%  | 0,757  | 29                           | 1,12%  |
| Haemothorax                                                                                   | 0                           | 0,00%   | 0                                   | 0,00%  | N      | 3                            | 0,11%  |
| Tricuspid valve damage (significant) during TLE                                               | 0                           | 0,00%   | 0                                   | 0,00%  | N      | 17                           | 0,64%  |
| Rescue cardiac surgery                                                                        | 0                           | 0,00%   | 0                                   | 0,00%  | N      | 24                           | 89,60% |
| Minor complications (any)                                                                     | 3                           | 7,14%   | 11                                  | 14,29% | 0,391  | 218                          | 8,15%  |
| Death procedure related (intra, post-procedural)                                              | 0                           | 0,00%   | 0                                   | 0,00%  | N      | 0                            | 0,00%  |
| Death indication-related (intra, post-procedural)                                             | 0                           | 0,00%   | 0                                   | 0,00%  | N      | 1                            | 0,04%  |
| Partial radiological success (remained tip or < 4 cm lead fragment)                           | 1                           | 2,38%   | 9                                   | 11,69% | 0,161  | 103                          | 3,85%  |
| Full Clinical Success                                                                         | 42                          | 100,00% | 76                                  | 98,70% | 0,757  | 2622                         | 97,91% |
| Full Procedural Success                                                                       | 41                          | 97,62%  | 67                                  | 87,01% | 0,115  | 2554                         | 95,37% |
| <b>Long-term mortality after TLE</b>                                                          |                             |         |                                     |        |        |                              |        |
| Alive during 1658 ± 1203 (1 – 5519) days of follow up                                         | 34                          | 80.95%  | 44                                  | 57.14% | 0.016  | 1874                         | 69.98% |
| Death during all 1658 ± 1203 (1 – 5519) days of follow up                                     | 8                           | 19.05%  | 33                                  | 42.86% | 0.016  | 804                          | 30.02% |

Abbreviations: LDTVd- lead dependent tricuspid valve dysfunction, TLE- transvenous lead extraction

**Table S4. Echocardiographic findings / abnormalities. Classification according to the influence of TLE on LDTVd**

| Echocardiographic findings / abnormalities recorded in patients with or without LDTVd | LDTVd improvement after TLE |        | LDTVd Lack of improvement after TLE |        |        | All examined patients (2678) |        |
|---------------------------------------------------------------------------------------|-----------------------------|--------|-------------------------------------|--------|--------|------------------------------|--------|
| Number of patients number of the group                                                | 42                          | 3      | 77                                  | 4      |        | 2678                         | 5      |
| Presented values                                                                      | Count / average             | % / Sd | Count / average                     | % / Sd | 3 vs 4 | Count / average              | % / Sd |
| <b>Echocardiography before and after TLE</b>                                          |                             |        |                                     |        |        |                              |        |
| Average LVEF                                                                          | 46,93                       | 13,88  | 49,48                               | 12,93  | 0,532  | 49,48                        | 15,37  |
| Mitral regurgitation (significant)                                                    | 10/42                       | 23,81% | 14/70                               | 20,00% | 0,576  | 376/2640                     | 14,24% |
| PASP (mmHg)                                                                           | 42,46                       | 12,51  | 39,70                               | 13,84  | 0,354  | 30,95                        | 13,34  |
| RV diameter (mm)                                                                      | 33,83                       | 6,20   | 36,60                               | 8,08   | 0,081  | 31,43                        | 6,14   |
| <b>Tricuspid Regurgitation before TLE</b>                                             |                             |        |                                     |        |        |                              |        |
| Non-significant (0,1,2 grade )                                                        | 0/42                        | 0,00%  | 14/77                               | 18,18% | 0,008  | 2137/2672                    | 79,99% |
| Significant (3 grade)                                                                 | 18/42                       | 42,86% | 30/77                               | 38,96% | 0,827  | 408/2672                     | 15,27% |
| Severe (4 grade)                                                                      | 24/42                       | 57,14% | 33/77                               | 42,86% | 0,217  | 127/2672                     | 4,75%  |
| <b>Any shadows on the leads before TLE</b>                                            |                             |        |                                     |        |        |                              |        |
| Any shadows on leads before TLE                                                       | 20/42                       | 47,62% | 43/77                               | 55,84% | 0,546  | 1327/2673                    | 49,55% |
| Connecting tissue surrounding the lead                                                | 2/42                        | 4,76%  | 5/77                                | 6,49%  | 0,981  | 269/2676                     | 10,05% |
| Blood clot on the lead                                                                | 3/42                        | 7,14%  | 8/77                                | 10,39% | 0,8    | 175/2676                     | 6,50%  |
| Vegetation-like mass                                                                  | 1/42                        | 2,38%  | 3/77                                | 3,90%  | 0,925  | 111/2676                     | 4,15%  |
| Thicker lead                                                                          | 11/42                       | 26,19% | 15/77                               | 19,48% | 0,539  | 496/2676                     | 18,54% |
| Vegetation                                                                            | 2/42                        | 4,76%  | 14/77                               | 18,18% | 0,077  | 466/2675                     | 17,42% |
| Strong connective tissue scar connection of the lead with heart structures (any)      | 7/41                        | 16,67% | 21/74                               | 28,38% | 0,131  | 343/2613                     | 13,13% |
| Strong connective tissue scar connection of the lead with tricuspid apparatus         | 2/42                        | 4,76%  | 15/77                               | 19,48% | 0,055  | 141/2676                     | 5,27%  |
| Strong connective tissue scar connection of the lead with RA wall                     | 5/42                        | 11,91% | 6/77                                | 7,79%  | 0,683  | 110/2676                     | 4,11%  |
| Strong connective tissue scar connection of the lead with SVC                         | 0/42                        | 0,00%  | 5/77                                | 6,49%  | 0,227  | 109/2676                     | 4,07%  |
| Strong connective tissue scar connection of the lead with RV wall                     | 6/42                        | 14,29% | 8/77                                | 10,39% | 0,824  | 171/2676                     | 6,39%  |
| <b>Loops of the leads</b>                                                             |                             |        |                                     |        |        |                              |        |
| Excessive loops of the leads in the heart (any) / ECHO                                | 16/42                       | 38,10% | 27/77                               | 35,07% | 0,957  | 493/2677                     | 18,42% |
| Excessive loop in the RA                                                              | 10/42                       | 23,81% | 17/77                               | 22,08% | 0,989  | 358/2677                     | 13,37% |
| Excessive loop in the TV                                                              | 10/42                       | 23,81% | 17/77                               | 22,08% | 0,989  | 121/2677                     | 4,52%  |
| Excessive loop in the RV                                                              | 7/42                        | 16,67% | 13/77                               | 16,88% | 0,821  | 144/2677                     | 5,38%  |

Abbreviations: LVEF- left ventricular ejection fraction, LDTVd- lead dependent tricuspid valve dysfunction, PASP- pulmonary artery systolic pressure, RA- right atrium, RV- right ventricle, SVC- superior vena cava, TLE- transvenous lead extraction, TV- tricuspid valve
